# Supplementary material for: Characterization of Riparian Tree Communities along a River Basin in the Pacific Slope of Guatemala
Source: MDPI journal article supplement (doi:10.3390/f12070898), 2021-07-09

## Supplementary Materials for the article “Characterization of the riparian tree communities along a river basin in the Pacific Slope of Guatemala”.

**Table S1.** Location of the sampling plots along the Acomé riverbanks.

| Plot | Longitude | Latitude | Altitude |
|------|-----------|----------|----------|
| 1    | -91.08209 | 13.92873 | 11       |
| 2    | -91.08344 | 13.91853 | 13       |
| 3    | -91.07535 | 13.942   | 16       |
| 4    | -91.07552 | 13.94998 | 21       |
| 5    | -91.07909 | 13.95831 | 17       |
| 6    | -91.0792  | 13.96639 | 13       |
| 7    | -91.08137 | 13.97528 | 13       |
| 8    | -91.08301 | 13.98492 | 13       |
| 9    | -91.08559 | 13.99263 | 37       |
| 10   | -91.07666 | 13.99696 | 22       |
| 11   | -91.07523 | 14.00667 | 16       |
| 12   | -91.07377 | 14.01433 | 26       |
| 13   | -91.06851 | 14.02187 | 45       |
| 14   | -91.06337 | 14.02889 | 42       |
| 15   | -91.0565  | 14.03504 | 36       |
| 16   | -91.05369 | 14.04474 | 46       |
| 17   | -91.0486  | 14.05105 | 32       |
| 18   | -91.04555 | 14.06049 | 36       |
| 19   | -91.05066 | 14.06611 | 38       |
| 20   | -91.05029 | 14.07181 | 44       |
| 21   | -91.04581 | 14.07708 | 52       |
| 22   | -91.04655 | 14.08327 | 56       |
| 23   | -91.04613 | 14.09041 | 45       |
| 24   | -91.03997 | 14.09622 | 40       |
| 25   | -91.03376 | 14.10082 | 49       |
| 26   | -91.02808 | 14.10368 | 45       |
| 27   | -91.01776 | 14.10698 | 53       |
| 28   | -91.01398 | 14.1119  | 53       |
| 29   | -91.01299 | 14.11667 | 49       |
| 30   | -91.01125 | 14.12041 | 49       |
| 31   | -91.01157 | 14.13159 | 58       |
| 32   | -91.00411 | 14.13568 | 61       |
| 33   | -91.00034 | 14.14392 | 57       |
| 34   | -90.995   | 14.1501  | 79       |
| 35   | -90.99264 | 14.16123 | 86       |
| 36   | -90.99158 | 14.16805 | 94       |
| 37   | -90.99194 | 14.17407 | 117      |

|    |            |           |     |
|----|------------|-----------|-----|
| 38 | -90.98681  | 14.18191  | 107 |
| 39 | -90.98675  | 14.19119  | 135 |
| 40 | -90.98412  | 14.19974  | 138 |
| 41 | -90.98394  | 14.20789  | 149 |
| 42 | -90.98392  | 14.21239  | 165 |
| 43 | -90.98301  | 14.22267  | 177 |
| 44 | -90.98035  | 14.23436  | 204 |
| 45 | -90.98445  | 14.24209  | 210 |
| 46 | -90.98555  | 14.25103  | 227 |
| 47 | -90.98792  | 14.25948  | 259 |
| 48 | -90.99012  | 14.26716  | 267 |
| 49 | -90.99288  | 14.2753   | 270 |
| 50 | -90.99198  | 14.28435  | 300 |
| 51 | -90.99167  | 14.29338  | 316 |
| 52 | -90.99156  | 14.30171  | 342 |
| 53 | -90.98801  | 14.30926  | 360 |
| 54 | -90.98656  | 14.32149  | 409 |
| 55 | -90.98467  | 14.33011  | 432 |
| 56 | -90.983020 | 14.337270 | 546 |

Note: Longitude and latitude are in geographic coordinates (degrees), and altitude is in meters above sea level.

**Figure S1.** System used to dry botanical specimens.

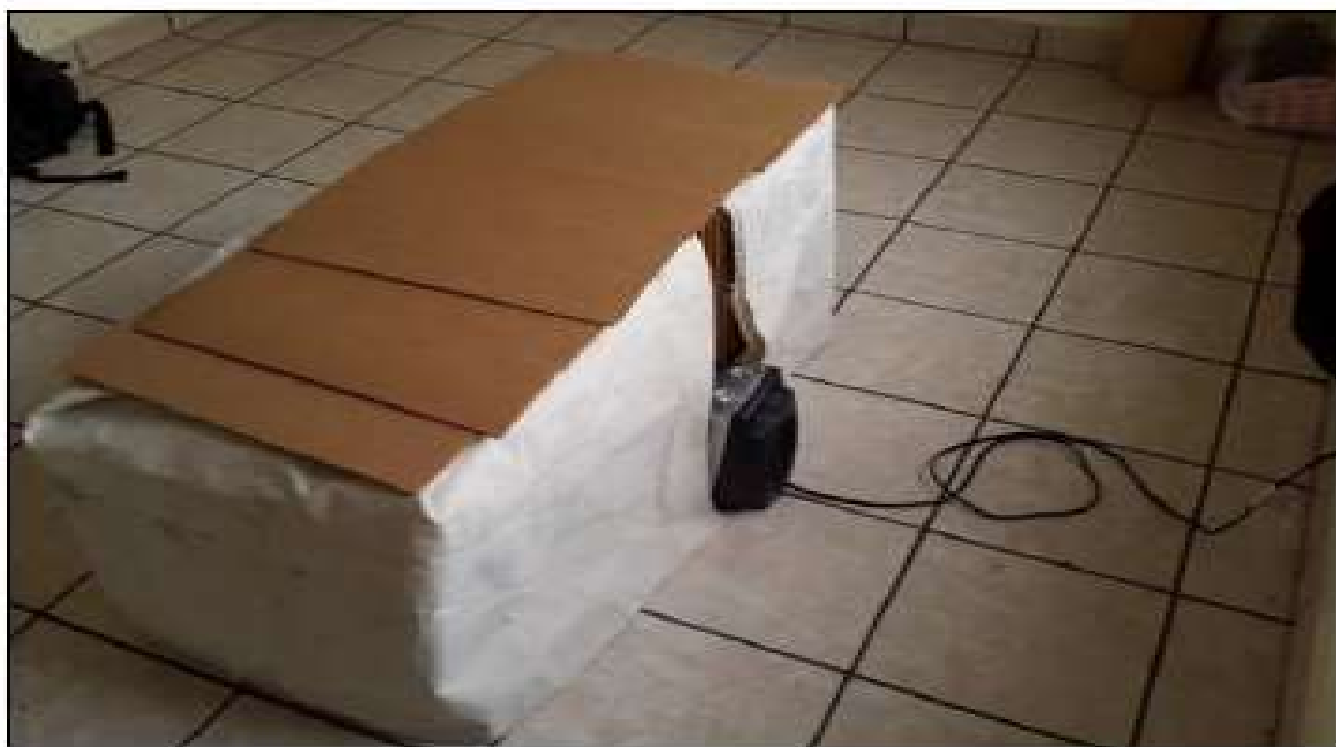

**Figure S2.** Non-metric multinational scaling with data on the abundance of species per tree community.

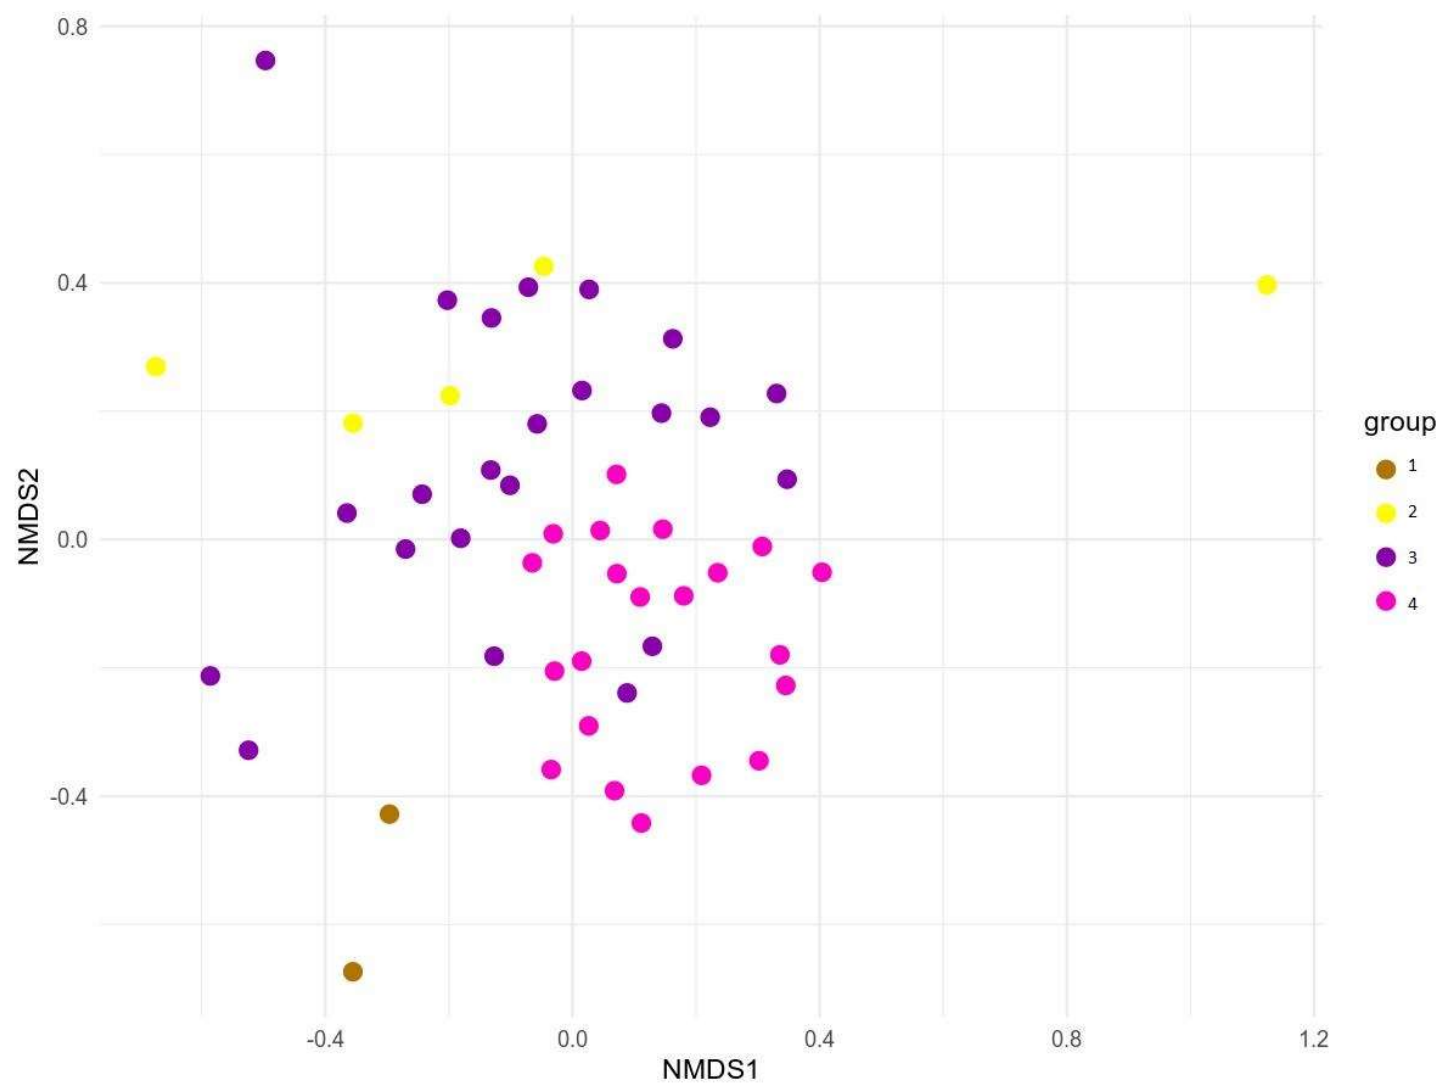

Supplement: s1 [file s1]
